# Supplementary material for: Treatment of peanut allergy and colitis in mice via the intestinal release of butyrate from polymeric micelles
Source: Nat Biomed Eng. 2022 Dec 22;7(1):38–55. doi: 10.1038/s41551-022-00972-5 (PMC9870785; doi:10.1038/s41551-022-00972-5)
Supplement: Source data Figs. 2–8 and Extended Data Figs. 1, 2, 4, 6 and 7 — Statistical source data for Figs. 2–8 and Extended Data Figs. 1, 2, 4, 6 and 7. [file 41551_2022_972_MOESM4_ESM.xlsx]

## Sheet: Fig 2
Fig 2d
	Micelle	Diameter (nm)	PDI		Micelle	Diameter (nm)	PDI		Micelle	Zeta-potential (mV)		Micelle	Zeta-potential (mV)
	NtL-ButM	44.97	0.092		Neg-ButM	41.52	0.126		NtL-ButM	0.193		Neg-ButM	-28.9
	NtL-ButM	43.72	0.058		Neg-ButM	39.87	0.084		NtL-ButM	-0.766		Neg-ButM	-32.6
	NtL-ButM	45.35	0.053		Neg-ButM	38.24	0.079		NtL-ButM	-0.445		Neg-ButM	-33
	AVG	44.68	0.0676667		39.8767	0.0963333			AVG	-0.339333		AVG	-31.5
	STD	0.852819	0.0212211		1.64001	0.0258134			STD	0.488154		STD	2.26053
	NtL-ButM	CMC avg		CMC lo		CMC hi
	mg/mL	-1.48	0.0331131	-1.68	0.020893	-1.335	0.0462381
	uM		0.812253		0.512497		1.1342
				delta	0.299756		0.321951
	Neg-ButM	CMC avg		CMC lo		CMC hi
	mg/mL	-0.4743	0.335506	-0.5701	0.269092	-0.3608	0.435712
	uM		14.0244		11.2482		18.2131
				delta	2.77617		4.18872
	NtL-ButM		Rg	14.2 nm
	q	I	q square	ln I	fit	ln I - fit
	0.00323694	4175.5	1.04778e-05	8.33699	8.31709	0.0198989
	0.00350857	4166	1.23101e-05	8.33471	8.30481	0.0298989
	0.0037802	4058.85	1.42899e-05	8.30865	8.29155	0.0171088
	0.00405183	3995.95	1.64173e-05	8.29304	8.27729	0.0157458
	0.00432346	3871.3	1.86923e-05	8.26135	8.26205	-0.000700947
	0.00459508	3809.31	2.11148e-05	8.2452	8.24581	-0.000610865
	0.00486671	3752.65	2.36849e-05	8.23022	8.22859	0.00162509
	0.00513834	3657.98	2.64025e-05	8.20467	8.21038	-0.00571551
	0.00540997	3545.13	2.92678e-05	8.17333	8.19118	-0.0178524
	0.0056816	3470.86	3.22806e-05	8.15216	8.17099	-0.0188366
	0.00595322	3424.85	3.54408e-05	8.13881	8.14982	-0.0110051
	0.00622485	3347.06	3.87488e-05	8.11584	8.12765	-0.0118147
	0.00649648	3256.5	4.22043e-05	8.08841	8.1045	-0.0160895
	0.00676811	3176.08	4.58073e-05	8.0634	8.08035	-0.0169513
	0.00703973	3121.28	4.95578e-05	8.046	8.05522	-0.00922465
	0.00731136	3040.94	5.3456e-05	8.01992	8.0291	-0.00918018
	0.00758299	2960.32	5.75017e-05	7.99305	8.00199	-0.00893971
	0.00785462	2885.73	6.16951e-05	7.96753	7.97389	-0.00636059
	0.00812625	2813.03	6.60359e-05	7.94202	7.94481	-0.00278891
	0.00839787	2749.15	7.05242e-05	7.91905	7.91473	0.00431575
	0.0086695	2665.25	7.51602e-05	7.88805	7.88367	0.00438681
	0.00894113	2577.03	7.99438e-05	7.85439	7.85161	0.00278031
	0.00921276	2497.94	8.48749e-05	7.82322	7.81857	0.00465171
	0.00948439	2429.61	8.99537e-05	7.79549	7.78454	0.0109475
	0.00975601	2375.79	9.51797e-05	7.77309	7.74952	0.0235656
	Neg-ButM		Rg	13.5 nm
	q	I	q square	ln I	fit	ln I - fit
	0.00323694	4534.2	1.04778e-05	8.4194	8.44119	-0.021786
	0.00350857	4408.6	1.23101e-05	8.39131	8.43008	-0.0387713
	0.0037802	4542	1.42899e-05	8.42112	8.41808	0.0030396
	0.00405183	4425.55	1.64173e-05	8.39515	8.40519	-0.0100382
	0.00432346	4332.43	1.86923e-05	8.37388	8.3914	-0.0175146
	0.00459508	4351.79	2.11148e-05	8.37834	8.37671	0.00162754
	0.00486671	4288.93	2.36849e-05	8.36379	8.36114	0.00265601
	0.00513834	4242.27	2.64025e-05	8.35285	8.34466	0.00819013
	0.00540997	4179.39	2.92678e-05	8.33792	8.3273	0.0106243
	0.0056816	4133.54	3.22806e-05	8.32689	8.30903	0.017855
	0.00595322	4039.08	3.54408e-05	8.30377	8.28988	0.0138933
	0.00622485	3964.35	3.87488e-05	8.2851	8.26983	0.0152689
	0.00649648	3876.61	4.22043e-05	8.26272	8.24888	0.0138332
	0.00676811	3788.7	4.58073e-05	8.23978	8.22704	0.0127347
	0.00703973	3701.61	4.95578e-05	8.21652	8.20431	0.0122128
	0.00731136	3596.9	5.3456e-05	8.18783	8.18068	0.00714575
	0.00758299	3509.05	5.75017e-05	8.1631	8.15616	0.00694166
	0.00785462	3431.2	6.16951e-05	8.14067	8.13074	0.00992374
	0.00812625	3336.66	6.60359e-05	8.11273	8.10443	0.00829583
	0.00839787	3212.77	7.05242e-05	8.07489	8.07722	-0.00233572
	0.0086695	3107.12	7.51602e-05	8.04145	8.04912	-0.00767225
	0.00894113	3020.48	7.99438e-05	8.01317	8.02013	-0.00695758
	0.00921276	2931.13	8.48749e-05	7.98314	7.99024	-0.0070957
	0.00948439	2828.24	8.99537e-05	7.94741	7.95945	-0.012045
	0.00975601	2720.8	9.51797e-05	7.90868	7.92778	-0.0190963

## Sheet: Fig 3
Fig. 3a	Time (d)	NtL-ButM			Neg-ButM
	0	9.46856	5.39269	4.67198	2.27347	3.01975	3.89643
	0.5	16.017	15.4418	16.7111	11.633	11.8581	15.2566
	1.67	38.8489	43.0985	38.2078	26.8211	24.885	38.0085
	3.67	97.5647	60.0582	109.304	43.9633	51.448	45.2399
	6	199.631	202.608	191.161	60.1946	63.8806	61.6165
	9	158.171	146.834	162.273	80.7096	66.8311	58.2939
	14	193.644	162.605	181.247	92.8122	95.4914	84.8841
	17	171.828	180.617	159.737	87.7078	86.6148	103.142
	20	189.375	192.984	193.192	93.868	94.6041	119.951
Fig. 3b	Time (h)	NtL-ButM			Neg-ButM			NtL-ButM PBS			Neg-ButM PBS
	0	153.12	130.869	142.421	144.319	147.879	152.324	12.5015	36.4119	18.5904	11.4287	15.4176	8.33158
	0.5	144.409	147.903	134.865	131.587	137.346	146.107
	1	131.273	143.435	132.803	129.603	123.081	132.767
	2	151.628	119.829	111.074	120.21	127.569	116.01
	3	104.107	99.5984	118.179	111.335	121.179	114.631	20.235	19.3217	19.0454	9.99497	13.4013	11.5399
	4	114.991	97.6484	82.0006	112.221	112.382	113.62
	6	113.463	105.945	120.429	119.215	125.857	121.066
	14	108.777	128.863	137.671	115.906	113.408	127.892	23.1733	30.7602	26.6817	11.003	11.0499	8.72208
Fig. 3c	Time (hours)	NtL-ButM										Neg-ButM
	1	296.7	233.2	166.953	196.377	278.8	222.289	249.012	231.343	285.072	179.574	22.4166	20.7115	76.1574	7.87807	27.9001	11.0119	6.28494	34.3915	14.0666
	2	81.6733	89.1333	35.4	93.88	23.4333	101.53	48.9	76.45	60.37	37.96	13.1656	13.95	17.2498	4.41274	25.6655	18.6723	16.0868	13.2794	16.2649
	4	18.6833	15.4	17.7667	12.2667	18.31	8.97199	7.58397	5.73837	12.8479	10.7693	12.3137	5.73837	3.32714	14.3898	23.3905	8.97199	10.0016	6.35283	13.5741
	8	17.2333	17.8	19.04	1.16667	0.366667	16.2649	13.5741	7.34396	12.4009	9.53018	11.6676	12.8479	12.4009	9.53018	11.1158	7.58397	9.78687	12.4702	7.34396
	12	4.4	9.3	2.73333	5.6	12.5667	10.1396	4.97147	5.73837	12.8479	17.2498	6.4106	10.8272	10.7693	8.17268	10.1396	7.87807	8.46066	10.8471	8.88875
	24	7.83333	11.7333	8.28	1.23333	6.41	8.17268	5.24715	17.2498	14.0666	16.2649	7.43986	8.87808	14.8496	5.24715	4.97147	6.28502	7.78732	8.63424	10.0539
Fig. 3d	Time (hours)	NtL-ButM										Neg-ButM
	1	803.149	575.686	633.91	708.765	700.424	355.437	511.108	466.96	791.278	700.424		355.437	1293.49	579.769	377.92	733.892	780.875	656.337	341.207
	2	656.337	1166.33	345.745	579.769	1128.02	656.337	341.207	740.12	837.034	968.019	740.12	384.19	1643.07	968.019	661.235	834.383	813.248	766.335	678.749
	4	666.954	341.898	511.108	753.259	676.112	951.76	700.424	766.335	814.842	661.235	837.034	620.257	873.332		823.045	1258.99	634.644	345.745	1226.74
	8	748.235	414.261	466.96	392.915	706.956	787.654	1377.5	656.337	869.158	796.524	1208.81	1280.59	1250	1358.71	1653.04	1727.6	1420.82	1445.17	1573.22
	12	259.979	508.837	1293.49	578.641	769.642	384.19	656.337	766.335	663.498	759.137	1749.17	1789.31	1429.91	1280.29	1271.74	1656.17	1815.56	1586.18	1590.94
	24	511.108	466.96	700.424	403.149	656.337	733.892	341.207	700.424	968.019	403.149	915.299	822.084	778.475	951.76	555.065	1077.39	949.733	777.498	1129.93
Fig. 3e	Time (hours)	NtL-ButM										Neg-ButM
	1	396.544	387.545	240.17	520.906	238.061	275.619	410.895	401.895	551.607	642.267	414.757	465.935	387.545	235.648	301.562	704.808	437.554	259.112	222.289
	2	540.781	368.609	521.924	151.524	437.436	663.498	387.545	235.648	231.343	285.072	179.574	150.797	279.647	649.469	267.084	275.619	410.895	318.108	181.791
	4	389.292	538.278	355.085	112.935	261.563	182.545	279.647	369.31	408.923	259.112	391.373	307.715	642.267	298.063	310.205	367.28	346.375	340.333	435.19
	8	248.863	400.533	437.554	410.895	308.923	456.473	307.715	347.689	649.469	298.063	227.889	347.689	248.863	400.533	555.099	726.233	379.503	248.174	169.31
	12	465.935	340.333	467.175	310.205	555.099	379.503	279.647	437.554	231.343	151.607	426.159	330.704	296.721	484.355	308.923	386.14	712.691	249.012	347.071
	24	150.797	279.647	484.355	308.923	248.174	269.31	310.205	367.28	227.889	347.689	309.085	840.607	231.343	285.072	456.473	467.175	816.9	141.524	151.607

## Sheet: Fig 4
Fig. 4b	FITC-dextran (ng/ml)
	Naive	PBS	CsA	ButM (High)	ButM (Medium)	ButM (Low)
	1528.37	2022.13	1846.63	1113.4	1179.64	1137.77
	1272.15	1176.98	1213.91	1456.03	1146.14	1177.74
	1248.55	2943.43	1255.4	1104.65	2059.06	1170.13
	1095.51	1719.86	1148.81	1138.15	1145.38	1200.96
	1119.49	1166.7	1152.62	1211.62	1153.76	1185.74
	1120.26	2552.83	1208.2	2451.94	1137.01	1641.05
	1146.9	3846.45	1432.43	2314.89	1232.18	2226.57
	1145.38	5149.58	1125.2	1305.28	1115.69	2890.89
				1492.96
				1133.58
				2115.79
				1131.68
				2094.85
				1339.92
				1135.1
				2525.8
Fig. 4d	FITC-dextran (ng/ml)
	PBS	ButM
	546	24
	234	84
	60	264
	564	243
	774	126
	93	75
	66	138
	216	27
	507	54
	129	282
		153

## Sheet: Fig 5
Fig. 5c		core body temperature drop
	min	Post-peanut sensitization
	0	0	0	0	0	0	0	0	0	0	0	0	0	0	0	0	0	0	0	0	0
	10	0.1	0.9	0.5	0.3	-0.1	-0.2	0.4	0.6	0.4	-0.8	0.3	0.1	0.4	-0.5	-0.3	-0.2	-2.1	0.4	1.1	0.3
	20	-0.9	0.3	0.1	0.3	0	-1.5	-0.6	0.6	-0.4	-1.4	-0.6	-0.8	0.4	-0.6	-0.9	-0.9	-3.8	0.4	-0.5	-0.3
	30	-1.9	-0.1	-0.6	0.1	-0.9	-3.5	-2.7	0.4	-1.3	-2.7	-1.7	-2.1	0.2	-1.8	-2.1	-3.5	-6	-0.8	-2	-1.1
	40	-1.3	0.2	0	-0.3	-0.9	-4.6	-2.9	0.3	-1.4	-3.4	-1.5	-2.1	0.2	-1.7	-2	-3.5	-7.3	-0.6	-1.9	-1.1
	50	-0.5	0.4	0	0.1	0	-3.8	-1.6	0	-3	-3.4	-1	-1.1	0.4	-1.3	-0.9	-2.5	-7.1	-0.2	-1.5	-0.9
	60	-0.5	0.4	-0.1	-0.5	-0.9	-2.8	-0.8	0.1	-3	-3.4	-0.2	-0.6	0.4	-0.3	-0.5	-1.5	-7.5	-0.1	-1.3	-0.5
	70	-0.6	-0.4	-0.7	-0.6	-0.8	-1.8	-0.3	-0.4	-1.3	-2.5	-0.6	-0.2	0.2	-0.8	-1.1	-1	-6.5	-0.6	-1.3	-0.8
	80	-0.1	0.3	0	0	0.1	-0.5	0.3	0.4	-0.1	-1.8	-0.4	-0.3	0.8	-0.1	-0.5	-0.9	-4.5	0.3	-1.1	-0.2
	90	0	0.6	0.3	0	0	-0.3	0.3	0.3	0.2	-1.6	0.1	0.2	0.8	-0.1	-0.4	-0.5	-3.7	0.5	-0.6	-0.2
		core body temperature drop
Fig.5d	min	PBS
	0	0	0	0	0	0	0	0	0	0	0	0	0	0	0	0	0	0	0	0	0	0	0	0	0	0	0	0	0	0	0	0	0	0	0	0	0	0	0	0	0	0	0	0	0	0	0	0	0
	10	-0.1	-0.3	-0.5	-1	-2.1	-3.2	-3.2	-1.5	-2.2	0.1	-0.3	-1.6	-0.8	-1	-1	-1.4	0.2	-0.6	-1	-0.5	-1	-0.4	-1	-1	-1.1	-0.6	-0.9	-1.3	-1.1	-1.1	-0.8	-1.8	-0.8	-0.4	0.1	0	-0.1	-1.9	-0.4	0	0.6	0.3	0	0.4	0.3	-0.7	-0.4	0.4
	20	-1.2	-1.3	-2.1	-2.4	-4.1	-5.2	-4.3	-2.3	-3.5	-0.6	-1.3	-3.7	-1.3	-1.4	-0.9	-2.3	0	-1.4	-2.2	-0.5	-1.8	-1.3	-0.9	-1.1	-1.6	-1	-0.8	-1.6	-1.8	-1.7	-1.7	-2.5	-1.6	-2.4	-1.5	-1.1	-0.1	-3	-0.8	-0.7	0.4	0.1	-1.9	0	0.2	-1.7	-0.8	-0.1
	30	-1.4	-1.6	-2	-3	-5.6	-5.5	-4.5	-3	-3.7	-1.4	-1.7	-4.1	-2.5	-2.7	-1.4	-3.5	0	-3.6	-5.6	-0.5	-4.1	-1.3	-1.2	-2.3	-1.8	-1.9	-1.2	-2.1	-2.1	-2.1	-2.7	-2.5	-1.7	-3.1	-2.3	-1.1	-0.6	-4.3	-0.9	-2.2	-0.2	0	-2.9	-0.2	0.5	-1.9	0.1	0
	40	0	-0.4	-0.7	-1.5	-6	-5.2	-3.3	-2.7	-2.6	-1.2	-1.8	-3.2	-2	-1.3	-1	-2.7	0.3	-3.1	-5.9	-0.5	-3.6	-1.3	-1.2	-2.8	-1.8	-2.5	-1.2	-2.6	-2.7	-2.5	-3.3	-2.8	-1.3	-2.5	-2	-0.6	-0.4	-4.4	-0.6	-2.4	-0.1	0.3	-3.4	0	0.3	-1	0.1	0
	50	0	-0.6	-0.2	-0.8	-5.9	-4.7	-2.7	-3.1	-2.3	-0.6	-1.2	-2.2	-0.6	-0.9	-0.6	-2.6	0.7	-2.9	-6.1	-0.5	-3.1	-1.3	-1.2	-1.8	-1	-1.1	-1	-2.1	-2.4	-2.1	-2.2	-2.4	-0.4	-1.9	-1.7	-0.1	0	-3.3	-0.1	-2.7	0.4	0.2	-3.7	0.5	0.5	-0.8	0	-0.1
	60	0	-1	-0.4	-0.2	-5.7	-4.2	-2.2	-3.4	-2	0.1	-0.6	-0.8	0.4	-0.5	-0.7	-2.4	0.7	-2.3	-5.5	-0.9	-1.7	-1.2	-1.2	-1.8	-1.3	-1.5	-1	-2.2	-2.5	-1.3	-1.9	-2.3	-0.2	-1.8	-1.8	0	0	-2.5	0	-2.1	0.2	0	-3.8	0.4	0.6	-0.6	0	-0.3
	70	0	-1.2	-0.7	-0.3	-4.7	-3.4	-1.8	-3.1	-1.7	0	-0.5	-0.7	0.4	-0.5	-0.8	-2.3	0.6	-2.2	-4.5	-1.1	-1.5	-1	-1.1	-1.5	-1.5	-1.6	-1	-2.1	-2.3	-1.2	-1.7	-2.2	0	-1.7	-1.9	0.2	0	-1.9	0.1	-1.6	-0.1	-0.2	-3.7	0.3	0.4	-0.5	0.2	-0.3
	80	-0.3	-0.9	-1	-0.4	-3.5	-2.8	-1.4	-2.9	-1.4	-0.7	-0.6	-0.2	0.1	-0.7	-0.9	-2.2	0.4	-2.1	-3.7	-1.2	-1.5	-0.9	-1.1	-1.4	-1.5	-1.5	-0.9	-1.2	-2.4	-0.7	-0.7	-1.4	-0.2	-1.3	-1.9	-0.1	0.1	-1.6	0.2	-1.9	-0.1	-0.3	-2.9	0.3	0.2	-0.4	0.4	-0.5
	90	-0.6	-0.6	-0.8	-0.6	-2.1	-2.8	-1.1	-2.6	-0.9	-0.1	-0.5	0.1	0.2	-0.9	-1.4	-1.8	0	-1.2	-2.5	-1.2	-1.5	-1	-0.9	-1.4	-1.4	-1.5	-0.9	-1.2	-2.4	-0.8	-1	-1.3	-0.4	-0.9	-2	-0.3	0.1	-1.2	0.3	-2.2	-0.1	-0.2	-2.1	0.4	0	-0.3	0.3	0.3
Fig. 5e	ButM	PBS		Fig. 5f	ButM	PBS		Fig. 5g	ButM	PBS		Fig. 5h	ButM	PBS
mMCPT-1	27.6442	127.359		Histamine	166.283	99.7632		PN IgE	19.4338	28.3817		PN IgG1	5.84324	3.40922
ng/mL	14.7676	89.0335		ng/mL	210.791	90.5907		ng/mL	35.2573	49.4983		ng/mL	10.6194	1.63627
	125.177	72.4846			193.724	134.74			101.144	48.2097			19.2948	2.82465
	0	185.657			170.679	187.982			45.5772	143.405			2.95449	31.0248
	25.9245	611.366			171.519	380.516			38.1959	420.506			11.7005	77.5616
	8.71185	463.142			209.324	310.87			28.7231	209.406			8.79406	16.444
	32.8882	274.701			159.183	214.629			31.3737	511.229			8.63055	4.85214
	148.853	106.425			140.23	82.8772			74.177	373.283			21.7939	7.0445
	54.2794	149.818			101.51	80.0789			20.3784	947.581			2.46968	3.86377
	159.788	5.8479			102.925	590.179			66.7034	10.2031			50.6536	6.68685
	48.4879	0			196.734	1191.36			19.9409	26.1582			4.06406	2.51497
	23.3736	134.515			134.828	8190.69			37.2303	39.084			15.9816	37.7571
	0	6.56506			87.7972	166.928			122.41	8.08084			3.57267	1.1141
	16.0365	22.3074			98.5686	1001.5			18.7842	14.4926			1.29306	1.05265
	205.872	56.2908			84.9612	458.964			66.3743	67.482			27.3597	1.73498
	250.278	61.7119			233.138	692.651			79.9918	225.424			14.0935	17.7525
	13.507	35.7523			98.6174	214.574			0.216713	24.4006			1.7465	5.63301
	70.8642	20.0912			61.1327	7654.55			131.266	53.6502			10.7453	39.1718
	21.7649	19.6154			103.489	0			194.364	18.9101			2.38604	11.7629
	12.0036	1.72125			56.1151	1273.22			28.8761	200.976			0	75.6221
	0	31.6229			98.7287	209.694			0	11.2913			0	3.0398
	17.1258	0			66.3472	196.008			1.61182	21.4538			0.786861	1.80691
	9.8349	0			70.6738	301.143			10.5924	2.37982			0.412715	0
	0	50.4123			41.8662	525.865			182.605	17.5282			115.718	5.42345
	5.83477	175.101			57.8743	832.184			29.9738	67.7958			12.1712	9.98139
	2.6508	233.205			81.4326	512.032			0	678.723			0.810898	20.1718
	8.70633	46.2189			124.361	247.155			71.0685	10.9913			14.4191	1.16514
	4.49629	33.1875			245.066	127.868			5.95017	86.8374			0.133331	1.08598
	11.5265	29.2891			53.6487	4316.55			4.21384	55.3069			0	5.46753
	2.17999	76.428			86.4307	4.7297			0	109.488			0	1.01018
	168.094	336.749			60.1337	8.5567			244.145	13.5893			19.2535	0.753214
	7.86216	34.7638			48.6388	5.5127			7.59014	4.8063			0.529935	1.95044
	87.5805	101.093			46.4995	147.603			142.723	130.342			43.9458	27.5472
	7.73035	189.731			48.3143	217.802			5.20067	166.507			0.162427	21.8967
	77.8602	317.453			98.5379	472.808			51.4742	85.863			6.40447	2.3244
	73.5446	8.39557			147.886	192.081			31.4859	16.1043			12.7844	0.556743
	9.78138	6.68766			76.7261	276.762			0	14.3052			1.88998	0.892055
	0	221.809			50.8247	375.716			0	156.594			2.07926	12.2417
	103.315	67.159			115.009	105.013			287.797	81.3666			24.4312	5.92254
	0	40.8616			17.1357	95.4091			0	146.527			0.0825301	7.91153
		core body temperature drop
Fig. 5i	min	PBS												ButM												NaBut
	0	0	0	0	0	0	0	0	0	0	0	0	0	0	0	0	0	0	0	0	0	0	0	0	0	0	0	0	0	0	0	0	0	0	0	0	0
	10	0	-1	0.6	0.6	-0.4	-0.5	-0.3	0.3	-2.1	-0.2	-0.8	-0.2	0.2	0.5	0	-0.1	0.5	0	0.3	0.2	0.9	0.1	0.4	0	0.1	-0.3	0.1	-0.3	-1.2	0.4	0.1	0	-0.5	-1.2	-0.5	-0.3
	20	-0.8	-1.6	-0.1	-1.3	-1.1	-1.3	-0.8	-1.5	-4.1	-4	-4.1	-3.5	0.6	-0.6	-0.6	-0.6	-0.5	0	-0.2	-0.8	0.4	-0.4	0.5	-0.2	-1	-1	-1.8	-1.7	-3.1	-0.3	-1.2	-1.3	-4.1	-4.3	-2.6	-2.9
	30	-0.8	-2.2	-1.1	-2.7	-1.9	-1.8	-1.1	-1	-4.2	-5.6	-5.9	-5.6	0.3	-2.2	-0.9	-1.3	0	0.1	0.4	-0.8	0.8	0	-0.1	-0.6	-1.2	-1.1	-1.9	-1.9	-3.4	-0.6	-2.3	-2	-5.3	-6.6	-3.5	-6.8
	40	-0.5	-2.2	-0.9	-2.5	-1.7	-1.3	-1.6	-0.7	-3.2	-6.2	-6.7	-7	0.3	-1.8	-0.1	-0.1	0.2	0.3	0.7	-1.3	0.6	-0.1	0.1	-0.6	-1.2	-1.3	-1.8	-1.3	-3.1	-0.6	-2.5	-1	-6.4	-6.9	-2.5	-7.8
	50	-1.4	-1.1	-1	-1.9	-1.3	-2.1	-2.1	-0.7	-2.4	-5.4	-6.4	-7	0.5	-0.3	0	0.1	0.7	0.3	0	-1.4	0.3	-0.9	0.1	-0.4	-1.3	-1.5	-1.8	-1.2	-2.4	-1.1	-2.4	-1.4	-6.3	-6.7	-1.9	-8.2
	60	-1.3	-1	-1.1	-1.3	-0.9	-2.6	-2.6	-0.7	-1.3	-4.5	-6	-6.9	0	-0.1	0.1	-0.3	0.5	0.2	0.4	-1.4	0.4	-0.7	0.2	-0.3	-1.3	-1.8	-1.8	-1.1	-1.9	-1.6	-2.2	-1.6	-6.1	-6.4	-1.1	-8.4
	70	-1.4	-0.7	-1.3	-1	-0.9	-2.5	-2.4	-1.3	-0.4	-2.9	-4.5	-6.1	-0.2	0	0.2	-0.6	0.3	0.1	0.7	-1.5	0.4	-0.6	-0.3	-0.2	-1	-1.8	-1.5	-1	-1.5	-1.1	-1.7	-1.5	-4.2	-4	-0.1	-7.8
	80	-1.5	-0.5	-1.5	-0.7	-0.9	-2.4	-2.2	-1.5	-0.8	-2.7	-3.9	-6.7	-0.2	0.1	0	-0.5	0.4	0.1	0.7	-1.9	0.1	-0.7	-0.5	-0.1	-0.7	-1.7	-1.2	-0.9	-1.1	-0.6	-1.1	-1.4	-2.9	-2.9	0.1	-6.4
	90	-0.7	0.4	-0.1	0.5	0.4	-1.8	-1.4	-1.5	-0.9	-2.3	-3	-5.8	-0.1	0.3	-0.1	-0.4	0.5	0	0.7	-2.1	-0.2	-0.8	0.5	0.4	0.3	-1	-0.6	0.3	-0.4	-0.5	-0.3	-1.2	-2	-1.7	0.3	-5.5
Fig. 5j	PBS	NaBut	ButM		Fig. 5k	PBS	NaBut	ButM		Fig. 5l	PBS	NaBut	ButM		Fig. 5m	PBS	NaBut	ButM
mMCPT-1	214.09	61.742	6.85978		Histamine	221.14	182.081	28.1696		PN IgE	12.5538	109.25	18.9166		PN IgG1	42.3294	5.51524	0.821988
ng/mL	25.4717	288.848	5.75637		ng/mL	278.044	278.304	328.416		ng/mL	85.276	55.5684	35.0017		ng/mL	6.90428	4.17635	5.97538
	4.38992	49.4576	15.1876			223.931	238.926	53.8613			16.7647	49.6989	76.3214			28.5946	7.77628	10.2005
	21.0573	82.8417	27.2981			278.565	209.413	276.375			130.421	89.7709	173.994			7.53273	16.3687	2.54956
	342.948	175.171	0			310.564	321.073	244.991			107.251	119.757	23.9153			21.6895	21.3415	0.789612
	38.9756	3.69632	5.66134			347.528	168.279	127.155			41.7615	48.5895	16.9699			11.4365	5.41469	6.2697
	90.052	89.044	4.36942			493.889	226.558	224.26			99.7565	94.4043	21.3505			11.5754	15.7893	1.75653
	180.799	50.6175	9.48504			579.664	274.941	324.443			76.4789	89.1617	21.6331			12.0481	9.18298	10.9653
	28.7185	213.872	83.8935			221.57	507.891	441.453			87.5856	323.371	78.3128			11.816	42.2494	2.2179
	8.19076	290.535	21.0586			232.026	392.199	123.731			736.114	262.53	79.0045			69.4858	13.4754	11.9289
	35.8302	203.063	50.5789			237.914	380.143				138.712	51.4658	38.8823			37.0978	4.30221	30.8452
	28.4463	210.901	302.893			271.751	1423.19				688.726	923.605	61.6326			129.082	64.096	8.38039
[truncated: 32 more columns]

## Sheet: Fig 6
Fig. 6c	PBS	ButM		Fig. 6d	PBS	ButM
16s Sequencing	0.029455	0.01482		qPCR	1843	3396
	0.020892	0.034948			4539	9554
	0.016753	0.03259			1427	3077
	0.028443	0.091387			4128	5461
	0.020541	0.020518			3448	2675
	0.022648	0.02114			5079	2467
	0.020821	0.081104			2839	3056
	0.013373	0.113394			1183	1060
		0.054986				5466
		0.023428				5932
		0.161555				2249
		0.018319				3453
		0.057149				3526
		0.118698				4141
		0.078645				15520
		0.033407				7953
		0.016614				3657

## Sheet: Fig 7
Fig. 7c	Time (days)	Naive										Standard Transfer										Co-transfer										Co-transfer + ButM (low)										Co-transfer + ButM (mid)
	0	0	0	0	0	0						0	0	0	0	0	0	0	0	0	0	0	0	0	0	0	0	0	0	0	0	0	0	0	0	0	0	0	0	0	0	0	0	0	0	0	0	0	0
	1
	2
	3	-0.19	-3.47	3.63	1.95	3.91						-2.58	1.11	2.01	2.8	3.95	6.87	1.51	2.45	3.07	1.93	1.56	3.17	-2.01	5.63	2.79	1.08	1.33	0.6	-0.47	0.92	-0.52	-1.03	2.02	3.35	-2.78	4.37	3.83	4.38	3.68	0.22	-0.23	0.28	-2.45	3.81	-0.15	1.34	2.24	1.62
	4
	5
	6
	7	3.28	0.41	7.98	3.09	7.41						3.33	0.47	1.46	5.71	-1.32	4.93	3.83	2.45	2.04	6.38	2.8	4.92	2.67	6.21	5.87	1.87	1.68	2.13	3.63	2.48	4.24	-0.59	1.91	3.19	-1.15	5.58	7.08	5.41	6.83	0.34	5.46	2.22	-0.11	5.25	4.58	5.54	5.05	3.86
	8
	9
	10	10.65	3.7	10.42	5.37	11.02						8.97	0.7	4.18	8.57	7.18	0.72	9.06	6.67	7.21	7.65	3.34	9.51	5.28	10.12	9.88	8.26	2.86	3.67	4.44	8.58	5.27	4.9	6.7	10.73	2.89	7.9	9	2.64	8.75	5.83	8.51	4.67	4.51	6.75	7.53	10.27	10.15	5.99
	11
	12
	13
	14	4.96	5.32	12.61	5.42	11.85						8.28	0.58	5.19	9.21	7.29	7.42	7.66	5.89	7.69	5.98	5.01	12.56	6.89	8.82	8.25	6.64	1.89	2.46	4.29	6.62	1.81	8.81	3.51	9	4.14	8.21	5.28	5.79	10.78	2.69	9.3	5.86	6.18	10.96	7.53	6.83	10.1	4.7
	15
	16
	17	7.08	5.09	11.18	4.88	11.32						7.36	0.82	5.19	9.47	0.44	10.35	7.12	9.91	7.55	7.4	4.09	7.92	4.88	10.33	8.19	11.12	2.81	2.08	6.23	0.75	3.87	10.92	3.94	8.05	1.25	6.9	6.56	6.21	12.7	5.94	5.74	3.76	1.78	9.46	5.8	2.1	10.56	6.05
	18
	19
	20
	21	4.62	5.73	9.36	4.66	10.07						7.36	-6.35	2.52	3.86	-1.7	7.36	3.78	4.64	4.38	6.64	-1.35	4.19	3.52	9.81	3.25	5.07	-3.16	-1.48	4.01	1.84	3.41	7.98	2.39	4.02	2.45	7.06	6.74	7.2	10.35	4.2	6.34	5.12	0.78	10.21	3.15	6.08	8.92	4.65
	22
	23
	24	10.16	9.37	12.61	8.35	13.98						8.65	-2.39	5.04	4.34	0.66	8.47	1.29	6.47	5.74	7.6	-10.34	8.32	4.48	11.53	5.4	2.71	-1.07	1.2	6.18	2.94	4.18	8.86	3.09	-1.29	2.02	8.06	7.08	7.11	8.96	3.14	7.77	7.97	1.11	9.23	-0.31	6.94	10.25	4.31
	25
	26
	27
	28	10.21	13.14	13.57	9.22	14.99						9.56	-4.6	-3.52	12.06	-1.1	-0.39	0.16	2.03	7.98	9.57	-14.44	-4.81	6.44	6.83	5.52	-7.72	1.68	2.74	9.11	5.58	6.35	10.53	5.43	-5.25	6.16	10.01	-0.17	-4.47	9.98	2.3	10.08	9.22	-2	4.15	-0.15	6.19	8.26	5.38
	29
	30
	31	11.71	9.32	11.9	8.89	16.35						4.35	-7.63	-5.54	11.16	-5.7	-3.99	-0.81	-3.44	7.11	7.9	-27.48	-15.17	2.67	-1.72	6.91	-4.08	0.77	-4.27	6.09	2.3	5.68	9.94	-2.23	9.56	-4.31	8.11	-4.59	-2.16	8.32	1.23	6.8	7.63	-3.78	0.75	-1.58	0.27	0.15	1.23
	32
	33
	34
	35	10.45	9.66	13.43	10.2	15.7						-2.42	-8.22	-13.7	9.63	-10.36	-10.8	-5.61	-6.41	0.24	1.32	-18	-6.96	-3.57	5.11	4.76	-8.26	-9.49	-11.33	1.32	4.49	3.36	9.35	1.81	0.06	0.11	5.53	4.36	0.66	5.98	2.13	4.81	3.64	-0.83	5.54	-2.85	3.07	4.33	-0.9
	36
	37
	38	11.95	14.18	17.34	11.98	18.6						-4.84	-11.95	-8.31	8.78	-8.55	-13.23	-9.39	-3.6	-8.47	-2.33	-4.26	-4.7	-6.09	1.83	3.89	-12.25	-9.39	-11.06	-0.28	5.3	0.26	10.48	1.6	1.29	-0.05	2.05	6.04	0.38	3.31	4.65	2.36	5.98	0.72	6.17	-7.93	-9.31	-0.76	-9.63
	39
	40
	41
	42	11.03	20.78	15.91	14.59	20.14						-7.63	-15.38	8.66	4.18	-7.29	-17.88	-18.55	-5.63	-17.38	-4.46	-1.56	-4.02	-5.94	3.34	3.72	-16.28	-10.57	-14.83	-11.56	6.74	0.52	13.32	4.04	-8.44	-4.31	3.84	2.03	4.56	1.33	5.21	-3.98	5.18	-2.73	3.92	-13.94	-1.08	5.56	16.29
	43
	44
	45	14.6	12.15	12.8	12.69	21.92						-11.18	-16.67	-1.36	0.05	-8.55	-14.84	-16.24	-9.23	-19.62	-6.33	-1.19	-10.58	-7.85	5.01	-1.8	-17.31	-10.57	-16.58	-12.03	6.79	0.21	6.12	-4.41	-2.46	-17.28	1.42	-9.29	3.58	0.85	2.52	-7.54	5.63	-12.91	-6.06	-19.07	3.34	-2.8	21.05
	46
	47
	48
	49	16.18	13.31	15	13.18	19.43						-12.04	-17.37	-10.27	-5.4	-9.27	-7.14	-7.17	-5.06	-18.89	-6.18	-5.17	-12.22	-13.09	4.17	-6.1	-20.36	-11.23	-20.36	-11.56	2.19	-1.7	2.4	-6.86	-2.18	-9.27	-3.05	-8.19	-1.51	1.87	-6.11	-3.38	2.33	-14.25	-5.65	-21.82	1.83	-7.85	26.65
Fig. 7d	Naive	Standard Transfer	Co-transfer	Co-transfer + ButM (low)	Co-transfer + ButM (mid)	Co-transfer + ButM (high)
% body weight change (day 35)	10.45	-2.42	-18	3.36	4.81	-0.73
	9.66	-8.22	-6.96	9.35	3.64	8.51
	13.43	-13.7	-3.57	1.81	-0.83	-0.05
	10.2	9.63	5.11	0.06	5.54	6.76
	15.7	-10.36	4.76	0.11	-2.85	3.5
		-10.8	-8.26	5.53	3.07	9.32
		-5.61	-9.49	4.36	4.33	7.41
		-6.41	-11.33	0.66		10.76
		0.24	1.32	5.98	-0.9	4.36
		1.32	4.49	2.13	8.3	3.87
Fig. 7e	Naive	Standard Transfer	Co-transfer	Co-transfer + ButM (low)	Co-transfer + ButM (mid)	Co-transfer + ButM (high)
% body weight change (day 49)	16.18	-12.04	-5.17	-1.7	-3.38	-13.23
	13.31	-17.37	-12.22	2.4	2.33	6.38
	15	-10.27	-13.09	-6.86	-14.25	-5.43
	13.18	-5.4	4.17	-2.18	-5.65	-3.48
	19.43	-9.27	-6.1	-9.27	-21.82	4.14
		-7.14	-20.36	-3.05	1.83	-16.05
		-7.17	-11.23	-8.19	-7.85	2.62
		-5.06	-20.36	-1.51		-2.03
		-18.89	-11.56	1.87	26.65	-10.16
		-6.18	2.19	-6.11	11.3	-13.34
Fig. 7f	Naive	Standard Transfer	Co-transfer	Co-transfer + ButM (low)	Co-transfer + ButM (mid)	Co-transfer + ButM (high)
Colon weight per length (g/cm)	0.02625	0.100923	0.0699259	0.071	0.0828333	0.0577143
	0.024125	0.071	0.0903448	0.0525714	0.0735	0.0701539
	0.027625	0.128615	0.0937143	0.0747143	0.0711429	0.0348387
	0.0248571	0.0956522	0.099	0.0683077	0.0688571	0.0758333
	0.0257647	0.1008	0.0598667	0.0884286	0.0875714	0.074
		0.141077	0.101032	0.06125	0.0247742	0.0678571
		0.12112	0.08475	0.0375714	0.0472857	0.074
		0.130714	0.0885926	0.0665		0.0678571
		0.116333	0.0817333	0.0664828	0.0324286	0.0968333
		0.117517	0.0578461	0.0528571	0.0508571	0.0851429
[truncated: 11 more columns]

## Sheet: Fig 8
Fig. 8b	Naive	Standard Transfer	Co-transfer	Co-transfer + ButM (low)	Co-transfer + ButM (mid)	Co-transfer + ButM (high)
	0	50	41.7	41.7	41.7	50
	0	50	50	41.7	41.7	50
	0	50	50	50	25	50
	0	50	41.7	41.7	41.7	50
	0	50	50	41.7	41.7	16.7
		50	50	41.7	0	50
		50	41.7	25	25	41.7
		50	50	33.3	41.7	41.7
		50	41.7	41.7	16.7	50
		50	50	41.7		50
Fig. 8c	Naive	Standard Transfer	Co-transfer	Co-transfer + ButM (low)	Co-transfer + ButM (mid)	Co-transfer + ButM (high)
	0.1	0.3	0.3	0.3	0.3	0.4
	0	0.3	0.4	0.3	0.3	0.3
	0	0.3	0.4	0.3	0.3	0.3
	0	0.3	0.3	0.3	0.4	0.3
	0.1	0.3	0.4	0.4	0.3	0.1
		0.3	0.4	0.3	0.1	0.4
		0.3	0.4	0.3	0.2	0.4
		0.3	0.3	0.4	0.3	0.4
		0.4	0.3	0.3	0.2	0.4
		0.3	0.5	0.3		0.5
Fig. 8d	Naive	Standard Transfer	Co-transfer	Co-transfer + ButM (low)	Co-transfer + ButM (mid)	Co-transfer + ButM (high)
	0	1	1.1	1.3	1.7	2
	0	0.8	2	0.8	1	1.3
	0	1.3	1.7	1	1	1
	0	0.8	1.7	1.3	2	1.3
	0	0.8	1.5	1.8	1.2	0.1
		1.3	1.7	1.3	0.1	2
		1	1.3	0.6	0.6	1.7
		1.3	1	1.7	0.8	2
		1.7	1.3	1.2	0.6	1.7
		1.3	1.5	1.3		1.7
Fig. 8e	Naive	Standard Transfer	Co-transfer	Co-transfer + ButM (low)	Co-transfer + ButM (mid)	Co-transfer + ButM (high)
	0.3	4	3.7	3.3	4.7	4
	0.2	2.7	4.7	2	4.3	3.7
	0	4.7	4	3	4.7	4.7
	0	4	5	4.3	4	4
	0.2	4.7	3.7	4.3	4.7	0.3
		4.7	4.7	2.7	0.3	3.3
		4.3	4.7	0.8	1.3	4.3
		4.3	5	2.3	3	3.7
		4.7	3.7	3.3	1.2	4.3
		5	2	3.3		5

## Sheet: ED_Fig 1
Extended Data Fig. 1c	Stomach	butyrate content (ug/g)
	Time (hours)	NtL-ButM					Neg-ButM					NaBut
	1	0.449554	0.361458	1.73381	2.10156	1.58441	19.9942	14.8505	27.4824	2.95872	2.02799	559.644	572.736	96.7427	112.434	171.239
	2	0.127642	0.124407	3.41272	1.0016	0.854582	8.27475	6.4038	34.2001	22.1512	18.6581	479.55	368.096	246.047	181.428	41.4738
	4	0.2413	0.197166	1.09173	0.938961	0.720361	3.14482	2.99642	9.61663	6.70671	7.72928	74.4772	59.2784	74.6601	83.5184	82.2039
	8	0.155884	0.139447	2.19637	1.10172	0.893576	0.520199	0.407259	2.25659	1.49311	1.02287	2.48038	2.03577	1.43936	1.05704	1.56048
	12	0.409797	0.052178	0.582481	0.686502	0.648371	0.442614	0.386155	1.10989	0.875884	0.802632	0.747875	0.935234	0.996507	0.999322	0.565596
	24	0.192518	0.208328	1.76991	1.99603	1.30607	0.502151	0.476551	2.00995	2.11354	1.71758	1.76088	2.58311	2.26608	2.03537	2.69918
	Ileum	butyrate content (ug/g)
	Time (hours)	NtL-ButM					Neg-ButM					NaBut
	1	3.95982	4.36425	1.50034	0.552987	0.712607	1.34656	1.43786	0.390646	3.81099	3.12277	1.2974	1.83466	0.38892	0.282139	0.435803
	2	0.291873	0.286058	2.59612	0.416063	0.484826	0.868956	0.8968	1.32594	1.38732	1.07073	0.496084	0.459064	0.189578	0.125883	0.689021
	4	0	0.04891	0.47971	0.534707	0.477696	0.234699	0.285668	0.530084	1.11039	1.14304	0.436503	0.482367	0.448407	0.340685	0.424334
	8	0.517337	0.545322	0.8063	1.12535	1.12227	0.537818	0.756785	0.714843	0.641011	0.588582	0.600267	0.640337	0.289883	0.241474	0.253999
	12	0.445178	0.602783	0.486423	0.274984	0.290447	0.901349	0.907217	0.375953	0.748565	0.717629	0.340809	0.430597	0.270497	0.289393	0.309972
	24	0.272971	0.263148	0.382878	0.5213	0.499456	0	0	0.46534	0.411749	0.388877	0.993344	0.357744	0.249764	0.247513	0.480278
	Cecum	butyrate content (ug/g)
	Time (hours)	NtL-ButM					Neg-ButM					NaBut
	1	0.020646	0.166303	0.4869	0.32385	0.34477	1.25296	1.40418	0.300754	0.792187	0.74036	0.314041	0.220778	0.319408	0.379569	0.315621
	2	4.40948	4.04605	1.85364	1.52481	1.67392	1.28867	1.18508	0.361655	0.343426	0.479476	0.394925	0.317322	0.278391	0.201211	0.407115
	4	1.48706	1.56982	1.49625	3.54376	2.73436	3.9801	1.17516	0.573372	0.862311	0.838129	0.397937	0.340529	0.345367	0.391961	0.420523
	8	0.175824	0.231606	0.958051	0.809189	0.768154	0.38427	0.416693	0.853993	0.661981	0.720171	0.469658	0.536266	0.335902	0.33107	0.193511
	12	0.013926	0.01575	0.662315	0.44387	0.474502	0.0116	0.079662	0.257355	0.777199	0.850101	0.51748	0.442246	0.258451	0.279719	0.322436
	24	0	0	0.64005	0.431685	0.447265	0.072353	1.41502	0.724811	0.357215	0.359965	0.350853	0.329541	0.493098	1.69407	0.351417
	Colon	butyrate content (ug/g)
	Time (hours)	NtL-ButM					Neg-ButM					NaBut
	1	1.45306	0.805911	1.07835	0.920015	0.641667	1.8211	0.592947	0.847655	1.52133	1.31121	0.656215	0.643857	0.603616	0.584746	0.530909
	2	4.65304	4.15172	1.09832	1.61323	1.75889	1.81351	1.5543	1.22436	0.641264	0.729285	0.676036	0.679064	0.924487	0.622819	0.717359
	4	1.79558	1.66387	1.00029	2.87539	2.56424	0.651157	0.717164	1.33236	2.71929	2.59262	0.717144	0.594852	0.892267	0.714849	0.852103
	8	0.362771	0.309355	1.52953	1.03966	0.894856	0.518287	0.357519	1.14475	1.56178	1.62347	0.726066	0.700448	0.804028	0.868307	0.650548
	12	0.406378	0.365338	0.851694	0.955202	0.888865	0.43273	0.444801	0.953316	0.972107	1.10503	0.328784	0.755616	0.85053	0.80613	0.776922
	24	0	0	6.31012	0.832234	0.761573	0.117959	0	0.782164	0.688431	0.77243	0.748201	0.815092	0.553415	0.677398	0.551808

## Sheet: ED_Fig 2
Extended Data Fig. 2c
	PBS	NtL-ButM
	10546.5	16981.1
	9726.25	37377
	25281.5	23810.7
	4400.8	16111.5
	16553	14702.8
	17784.1	16988.5
	11863.7	49538
	19466.2	31688.9
	8494.59	18532.1
	11235.3	12969
	10091.6	16621.2
	7008.27	15021.9
	13614.9	13708.2
	16712.8	14343.4
	3657.89	27095
	5229.66	37668.9
	7796.89	35588.7
	9112.81	15759.7
	6760.35	17488.9
	11113.9	32623
	8706.87	13544.3
	15194.8	10170.4
	14811.9	15393.6
	20456.3	18983.9
	10583.7	33182.4
	3319.3	14400.8
	7359.3	11889
	7070.13	9415.43
	9347.84	13882.4
	10839.5	9454.3
	5114.87	10033.4
	11000.6	19446.9
	5089.07	38894.9
	4352.95	28378.9
	5451.33	19696.4
	8537.07	8022.18
	13046.7	6349.42
	20589.7	8557.89
	13475.0392*	11985.7
	20405.3	7330.54
	9608.28	11339.8
	17673.4	8607.78
		14448.1
		16562.8
		17054.3
		19064.4
		17089.6
		7793.48
		22120.7
		14433.8
		20971.2
		41370.4
		40049.3
		46828.4
		30936.5
		34022.4
		60530.5
		62696.8
		52585.1
		33332.9
		40461.3
		37909.7
		55543.3
		87009.2
		54358.6
		36152.2
		35942.3
		14481.9
		7456.1
		13827.8
		9935.16
		15063.2
		21272.6
		15151.1
		5607.05
		14753.6
		7481.95
		9067.06
		20858.3
		16838.5

## Sheet: ED_Fig 4
Extended Data Fig. 4c
	Time (min)	Allergic Pre Treatment (n=7)
	0	0	0	0	0	0	0	0
	10	0	0	-0.3	-1.8	-1.8	-2.2	-0.1
	20	-0.5	-1.1	-0.9	-1.9	-2.8	-3.3	-0.2
	30	-1.5	-3.1	-0.9	-2.8	-4.1	-3.9	-0.6
	40	-0.7	-2.2	-0.3	-2.4	-2.5	-2.8	-0.6
	50	-0.6	-2.1	-0.6	-2	-2.6	-2.4	-0.5
	60	-0.5	-2	-0.8	-1.5	-2.7	-2	-0.3
	70	-0.9	-1.8	-0.8	-1.4	-2.7	-2.3	-0.2
	80	-1.2	-1.6	-0.7	-1.3	-2.7	-2.5	-0.1
	90	-1.1	-1	-0.8	-1	-2.5	-1.8	-0.1
Extended Data Fig. 4d
	Time (min)	PBS													ButM												ButM (half dose)											Neg-ButM											NtL-ButM
	0	0	0	0	0	0	0	0	0	0	0	0	0	0	0	0	0	0	0	0	0	0	0	0	0	0	0	0	0	0	0	0	0	0	0	0	0	-0.8	0.2	0	0.3	1.8	0.4	-0.4	-1.1	-0.4	0.1	-1.1	0
	10	-0.1	-0.3	-0.5	-1	-2.1	-3.2	-3.2	-1.5	-2.2	-2.1	-0.2	-0.8	-0.2	0.6	0.3	0	0.4	0.3	-0.7	-0.4	0.4	0.7	0.3	-0.2	0	0.2	0.3	-0.5	-0.8	-0.1	-0.3	1	-0.4	-0.3	-0.5	-0.2	-2.7	-0.8	-1.9	0	0.3	-1.3	-2.3	-2.4	-0.8	-1.9	-3	-0.7
	20	-1.2	-1.3	-2.1	-2.4	-4.1	-5.2	-4.3	-2.3	-3.5	-4.1	-4	-4.1	-3.5	0.4	0.1	-1.9	0	0.2	-1.7	-0.8	-0.1	0.2	-0.1	-0.7	0	-0.3	-0.2	-1.3	-2.5	-0.5	-2.3	0.3	-0.4	-1.3	-1	-1	-2.9	-0.5	-3.6	-1.2	0.2	-1.2	-3.2	-3.2	0	-3.1	-4	-2
	30	-1.4	-1.6	-2	-3	-5.6	-5.5	-4.5	-3	-3.7	-4.2	-5.6	-5.9	-5.6	-0.2	0	-2.9	-0.2	0.5	-1.9	0.1	0	0.3	0.3	-0.7	0	-0.5	-0.4	-1.8	-3.5	-1	-3.3	0.4	-0.3	-1.4	-1.5	-1.4	-2.8	0.1	-4	-1.4	1	-0.4	-2.2	-2.6	0.3	-2	-3.8	-3
	40	0	-0.4	-0.7	-1.5	-6	-5.2	-3.3	-2.7	-2.6	-3.2	-6.2	-6.7	-7	-0.1	0.3	-3.4	0	0.3	-1	0.1	0	0.2	0.5	-0.3	0.4	-0.2	-0.4	-1.1	-2.5	-0.3	-1.9	0	0	-0.7	-1.2	-0.9	-2.2	0	-2.6	-2.4	0.3	0.4	-0.9	-1.3	0.2	-1	-3	-2
	50	0	-0.6	-0.2	-0.8	-5.9	-4.7	-2.7	-3.1	-2.3	-2.4	-5.4	-6.4	-7	0.4	0.2	-3.7	0.5	0.5	-0.8	0	-0.1	0.4	0.8	-0.2	0.6	-0.2	-0.5	-1.5	-3.5	-0.5	-1.2	0.3	-0.3	-0.6	-0.8	-0.7	-1	-0.4	-2.3	-1.8	-0.2	0.8	-0.9	-0.8	0.2	-0.5	-2	-1.9
	60	0	-1	-0.4	-0.2	-5.7	-4.2	-2.2	-3.4	-2	-1.3	-4.5	-6	-6.9	0.2	0	-3.8	0.4	0.6	-0.6	0	-0.3	0.6	0.8	0.1	0.4	-0.2	-0.6	-1.5	-3.1	-0.5	-0.6	0.3	-0.5	-0.4	-0.5	-0.5	-0.4	-0.4	-1.1	-1.5	-0.4	0.1	-0.9	-0.2	0.3	-0.6	-1.1	-1.7
	70	0	-1.2	-0.7	-0.3	-4.7	-3.4	-1.8	-3.1	-1.7	-0.4	-2.9	-4.5	-6.1	-0.1	-0.2	-3.7	0.3	0.4	-0.5	0.2	-0.3	0.5	0.5	-0.1	0.2	0.1	-0.5	-1.6	-3.3	-0.5	0	0.3	-0.5	-0.9	-0.7	-0.7	0.3	0.1	0.1	-0.7	0.5	0.7	-1.6	0.2	0.5	-0.4	-0.6	-1.5
	80	-0.3	-0.9	-1	-0.4	-3.5	-2.8	-1.4	-2.9	-1.4	-0.8	-2.7	-3.9	-6.7	-0.1	-0.3	-2.9	0.3	0.2	-0.4	0.4	-0.5	0.4	0.2	-0.4	-0.1	0.3	-0.4	-1.7	-3.5	-0.5	0	0.3	-0.6	-1.3	-0.8	-1	0	-0.1	0.1	0.1	0.3	0.5	-1.4	0.1	0.1	-0.4	-0.5	-1.3
	90	-0.6	-0.6	-0.8	-0.6	-2.1	-2.8	-1.1	-2.6	-0.9	-0.9	-2.3	-3	-5.8	-0.1	-0.2	-2.1	0.4	0	-0.3	0.3	0.3	0.6	0.3	-0.4	-0.1	0	-0.4	-1.5	-2.7	-0.6	0	0.2	-0.2	0.1	-0.2	-0.6												-1
	Extended Data Fig. 4e							Extended Data Fig. 4f							Extended Data Fig. 4g							Extended Data Fig. 4h
mMCPT-1	PBS	ButM	ButM (half dose)	Neg-ButM	NtL-ButM		Histamine	PBS	ButM	ButM (half dose)	Neg-ButM	NtL-ButM		PN IgE	PBS	ButM	ButM (half dose)	Neg-ButM	NtL-ButM		PN IgG1	PBS	ButM	ButM (half dose)	Neg-ButM	NtL-ButM
ng/mL	127.359	27.6442	33.6131	117.372	121.615		ng/mL	99.7632	166.283	177.497	288.236	349.293		ng/mL	28.3817	19.4338	1.29781	37.2246	25.1472		ng/mL	3.40922	5.84324	0.791059	22.2119	8.64883
	89.0335	14.7676	47.5853	19.8579	38.5974			90.5907	210.791	323.178	327.571	326.845			49.4983	35.2573	26.366	14.4693	125.183			1.63627	10.6194	2.56803	0.425996	46.8897
	72.4846	125.177	10.4081	243.905	9.82651			134.74	193.724	336.252	330.202	33.8169			48.2097	101.144	105.233	175.093	199.297			2.82465	19.2948	31.5428	29.9027	27.0005
	185.657	0	240.176	33.3934	16.0907			187.982	170.679	802.822	370.822	25.5424			143.405	45.5772	229.081	13.7026	1.40934			31.0248	2.95449	221.393	2.51718	1.9901
	611.366	25.9245	39.3746	17.8039	11.1533			380.516	171.519	307.3	299.542	81.3617			420.506	38.1959	17.1842	21.5842	0			77.5616	11.7005	4.7294	1.17426	1.01517
	463.142	8.71185	178.708	346.405	43.9094			310.87	209.324	370.114	266.064	96.8806			209.406	28.7231	180.385	76.4415	76.7169			16.444	8.79406	19.2483	3.56928	13.9396
	274.701	32.8882	33.0107	102.924	36.735			214.629	159.183	241.285	267.428	29.7414			511.229	31.3737	37.7187	65.7825	56.7314			4.85214	8.63055	11.3965	3.78814	9.24043
	106.425	148.853	5.66694	235.727	75.6045			82.8772	140.23	115.048	348.122	41.9227			373.283	74.177	0	64.5746	58.0593			7.0445	21.7939	1.45259	10.4705	6.38334
	149.818	54.2794	15.1738	27.2843	64.7578			80.0789	101.51	31.2923	301.473	48.2055			947.581	20.3784	129.953	216.319	27.9477			3.86377	2.46968	11.7179	31.6149	6.87088
	8.19076	159.788	20.99	19.9192	28.2304			232.026	102.925	201.861	421.871	47.023			736.114	66.7034	15.5515	38.8457	91.0498			69.4858	50.6536	0.980354	3.73476	11.0473
	35.8302	48.4879	47.6073	224.783	128.289			237.914	196.734	159.028	393.715	45.4216			138.712	19.9409	81.7018	249.811	145.623			37.0978	4.06406	1.11225	50.0059	2.66943
	28.4463	23.3736			7.53662			271.751	134.828			10.3325			688.726	37.2303			2.29628			129.082	15.9816		8.73385	2.92435
[truncated: 11 more columns]

[truncated: 2 more sheets: ED_Fig 6, ED_Fig 7]
